# Supplementary material for: Identification and characterization of trans-3-hydroxy-l-proline dehydratase and Δ1-pyrroline-2-carboxylate reductase involved in trans-3-hydroxy-l-proline metabolism of bacteria
Source: PubMed Central journal article supplement — FEBS Open Bio. 2014 Feb 26;4:240–50. doi: 10.1016/j.fob.2014.02.010 (PMC3958920; doi:10.1016/j.fob.2014.02.010), 2014-02-26
Supplement: mmc1.pdf [file mmc1.pdf]

**Supplementary Table S1. Primers used in this study.**

| Primers                                         | Sequences <sup>a</sup>                           |
|-------------------------------------------------|--------------------------------------------------|
| <i>Cloning of C14ofr149 gene into pETDuet-1</i> |                                                  |
| P1 (BamHI)                                      | 5'-catggatccgGAGAGCGCGCTGGCGGTGCCCCGGC-3'        |
| P2 (PstI)                                       | 5'-tggctgcagTCACTTGAGAAGAAATCCATCCCTC-3'         |
| <i>Cloning of PaLhpD genes into pETDuet-1</i>   |                                                  |
| P3 (BamHI)                                      | 5'-catggatccgATCCGAATGACGCTGGACGAGGTCCGCG-3'     |
| P4 (HindIII)                                    | 5'-attaagctTCACTCCAGCAACGCCAGCAGCTCCCGG-3'       |
| <i>Cloning of AbLhpH gene into pETDuet-1</i>    |                                                  |
| P5 (BamHI)                                      | 5'-catggatccgAAAATTACCCGATCCCTTTCCACCGTCG-3'     |
| P6 (HindIII)                                    | 5'-aattaagctTCAGGCGATGTTTTGCTCGGCCGACCAGCTGGC-3' |
| <i>Cloning of CpLhpH gene into pETDuet-1</i>    |                                                  |
| P7 (BamHI)                                      | 5'-catggatccgACAAAAATATAGCGCAAGCAGCTG-3'         |
| P8 (PstI)                                       | 5'-tggctgcagTTATCTTAATAAAAAACCATATTTTC-3'        |
| <i>Cloning of AbLhpI into pETDuet-1</i>         |                                                  |
| P9 (BamHI)                                      | 5'-catggatccgACCGCTCTTTCCCCGATTCCCGTTTTTCG-3'    |
| P10 (HindIII)                                   | 5'-attaagctTCAGCCGGCCCCGGCGTGCGGCCAGCG-3'        |
| <i>Cloning of CpLhpI into pETDuet-1</i>         |                                                  |
| P11 (BamHI)                                     | 5'-catggatccgAAAATTATTAGCGCCGAACAAGTCCACC-3'     |
| P12 (HindIII)                                   | 5'-tggctgcagTTAATCTGCTAACTTTTCTACTACGCTATG-3'    |
| <i>Disruptant construction of AbLhpI</i>        |                                                  |
| P13 (SacII)                                     | 5'-catccgcggGTCACGACGTTGTAAAACGACGGCC-3'         |
| P14 (SacII)                                     | 5'-tggccgcggTTTCACACAGGAAACAGCTATGACC-3'         |
| P15 (MfeI)                                      | 5'-catcaattgACCGCTCTTTCCCCGATTCCCGTTTTTCG-3'     |
| P16 (MfeI)                                      | 5'-attcaattgCAGCCGGCCCCGGCGTGCGGCCAGCG-3'        |

<sup>a</sup> Small letters indicate additional bases for introducing digestion sites of restriction enzymes in parentheses.

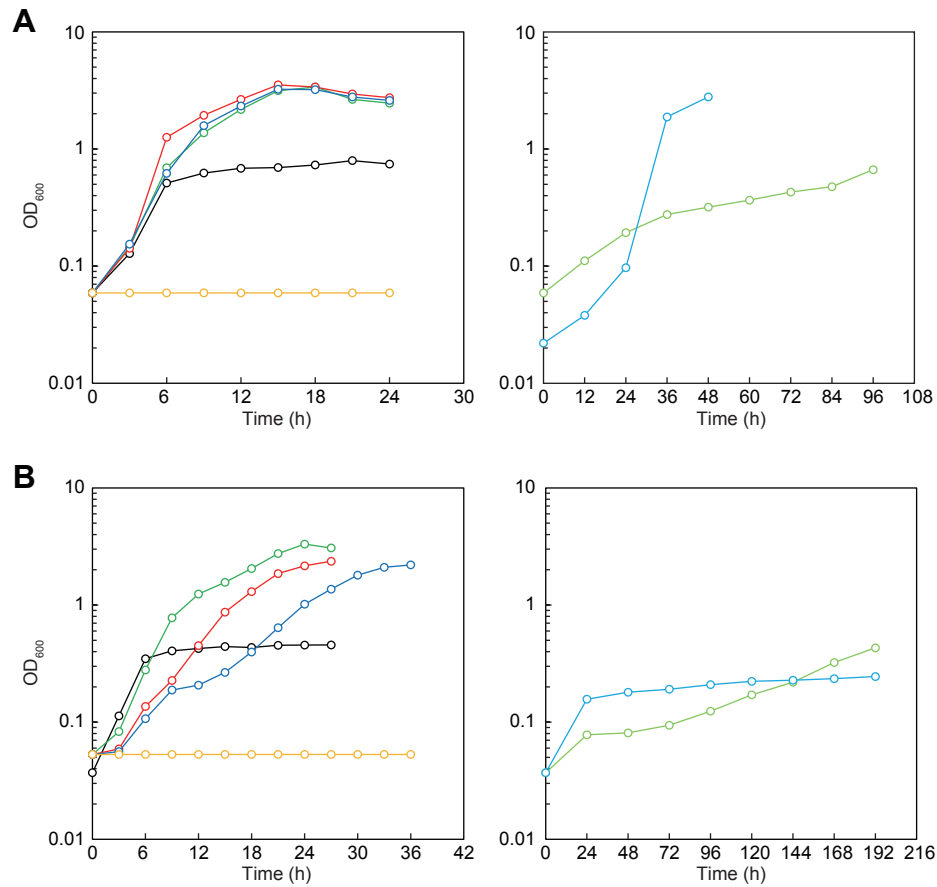

**FIGURE S1.** Growth curves of *P. putida* (A) and *P. aeruginosa* (B) on glucose (*black*), L-proline (*green*), D-proline (*light-green*), T4LHyp (*red*), C4DHyp (*blue*), T3LHyp (*yellow*) and D-lysine (*aqua*) as a sole carbon source (30 mM).

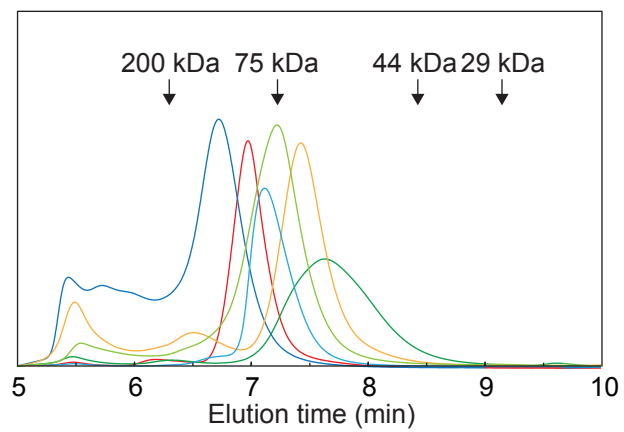

**FIGURE S2.** Elution profile of purified recombinant proteins during gel filtration. AbLhpH, *red*; CpLhpH, *blue*; C14orf149, *orange*; PaLhpD, *green*; AbLhpI, *light-green*; CpLhpI, *aqua*.

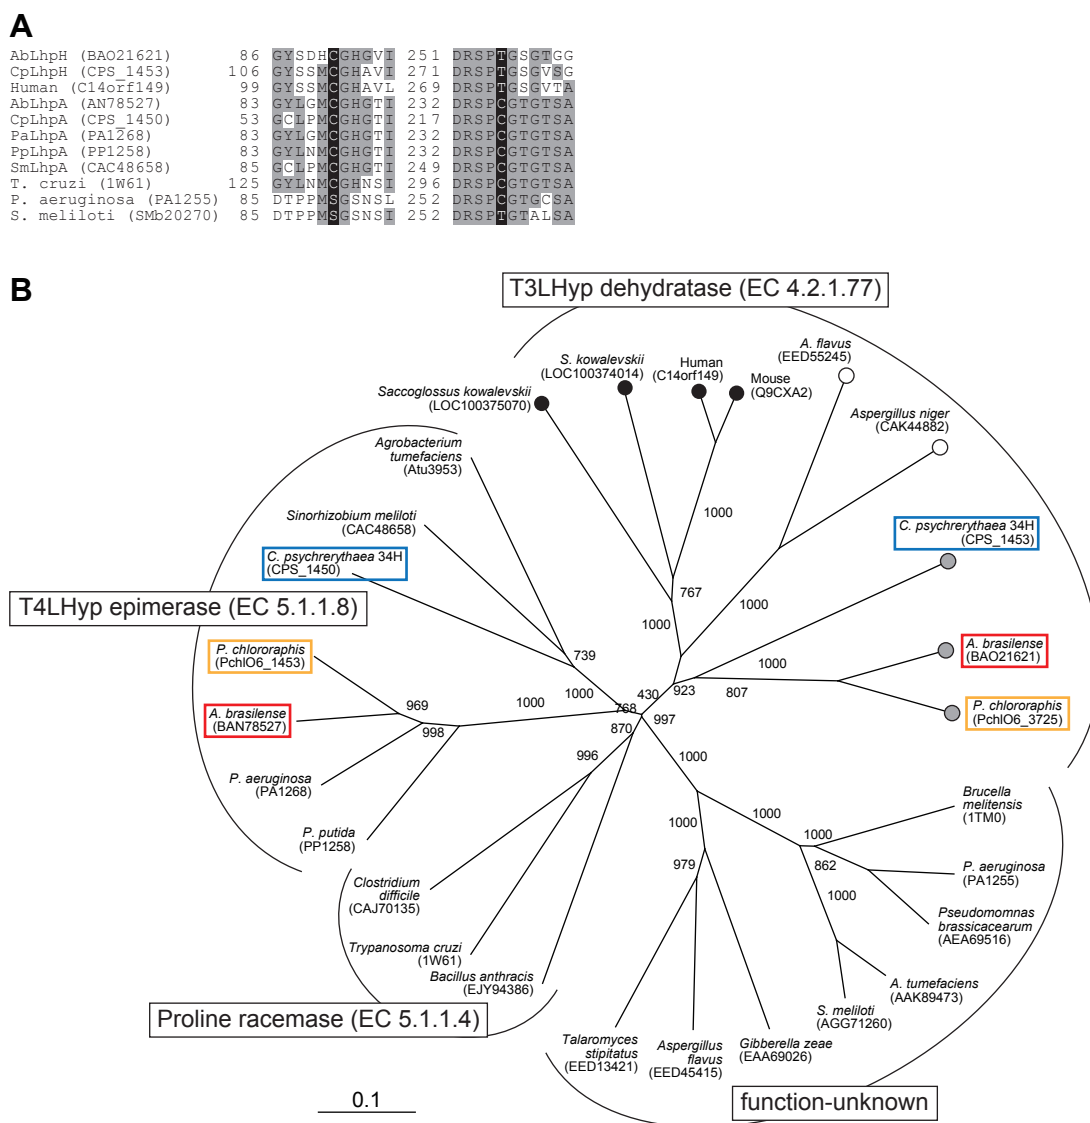

**FIGURE S3.** Phylogenetic analysis of T3LHyp dehydratase. (A) Phylogenetic tree of proline racemase superfamily. The *number* on each *branch* indicates the bootstrap value. T3LHyp dehydratases and T4LHyp epimerases from the same organisms are in the colored box. Proteins with *black*, *white* and *gray-colored circles* in T3LHyp dehydratase subfamily are from mammalian, fungi and bacteria (discovered in this study), respectively. (B) Partial multiple sequence alignment of deduced amino acid sequences. Catalytic cysteine and/or threonine residues are shown as *white letters in black boxes*. *Gray-shaded letters* indicate highly conserved amino acid residues.

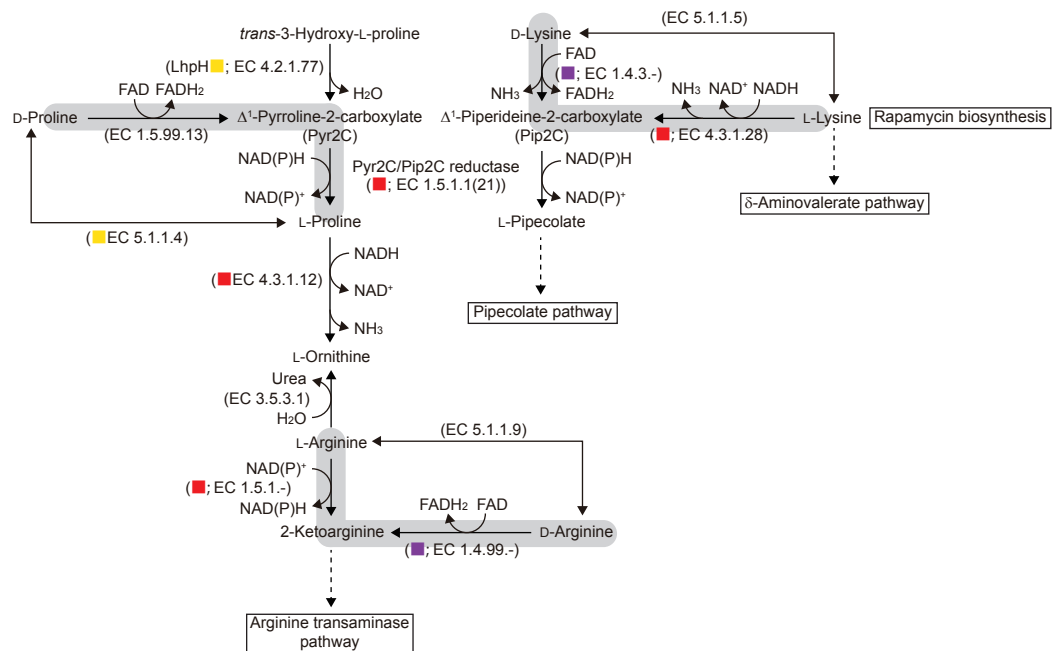

**FIGURE S4.** Metabolic pathways around Pyr2C/Pip2C reductase. Homologous genes are indicated in the same color, and correspond to Fig. 1ABD. *Gray-colored routes* indicate L- to D-epimerization (racemization) of amino acid consisting of two distinct FAD- and NAD(P)<sup>+</sup>-dependent dehydrogenase (oxidase).
